# Supplementary material for: Bimetallic Ru–Cu tellurido complexes: controlled synthesis and electrochemical studies of copper halide–TeRu5 and Te2Ru4clusters
Source: Royal Society of Chemistry journal article supplement (doi:10.1039/b919176c), 2009-12-03
Supplement: b919176c.pdf [file b919176c.pdf]

## Supplementary information for

### Bimetallic Ru—Cu Tellurido Complexes: Controlled Synthesis and Electrochemical Studies of Copper Halide-TeRu<sub>5</sub> and Te<sub>2</sub>Ru<sub>4</sub> Clusters

Minghuey Shieh,\* Yen-Yi Chu, Chia-Yeh Miu, Pei-Fan Wu, and Tsau-Ming Zeng  
Department of Chemistry, National Taiwan Normal University, Taipei 116, Taiwan,  
Republic of China

**Table S1.** Cyclic Voltammetry of [PPh<sub>4</sub>]<sub>2</sub>[**1**], [PPh<sub>4</sub>]<sub>2</sub>[**2a**], [PPh<sub>4</sub>]<sub>2</sub>[**2b**], [PPh<sub>4</sub>]<sub>2</sub>[**2c**], [PPh<sub>4</sub>]<sub>2</sub>[**3a**], [PPh<sub>4</sub>]<sub>2</sub>[**3b**], [PPh<sub>4</sub>]<sub>2</sub>[**5a**], [PPh<sub>4</sub>]<sub>2</sub>[**5b**], and [PPh<sub>4</sub>]<sub>2</sub>[**5c**].

| Compound                                       | Oxidation Process            | Reduction Process            |        |                               |                |        |
|------------------------------------------------|------------------------------|------------------------------|--------|-------------------------------|----------------|--------|
|                                                | $E_p^{\text{ox}}/\text{V}^a$ | $E_p^{\text{ox}}/\text{V}^a$ |        | $E_p^{\text{red}}/\text{V}^b$ |                |        |
| [PPh <sub>4</sub> ] <sub>2</sub> [ <b>1</b> ]  | 0.075                        |                              |        | -1.257                        | -1.402         | -1.910 |
| [PPh <sub>4</sub> ] <sub>2</sub> [ <b>2a</b> ] | 0.117                        | -0.291                       | -0.680 | -1.138                        | -1.458         | -1.837 |
| [PPh <sub>4</sub> ] <sub>2</sub> [ <b>2b</b> ] | ~ 0.169 <sup>c</sup>         | -0.230                       | -0.597 | -1.193                        | -1.402         | -1.817 |
| [PPh <sub>4</sub> ] <sub>2</sub> [ <b>2c</b> ] | 0.152                        | -0.246                       | -0.646 | - <sup>c</sup>                | - <sup>c</sup> | -1.811 |
| [PPh <sub>4</sub> ] <sub>2</sub> [ <b>3a</b> ] | 0.238                        | -0.129                       | -0.467 | -1.055                        | - <sup>c</sup> | -1.720 |
| [PPh <sub>4</sub> ] <sub>2</sub> [ <b>3b</b> ] | 0.188                        | -0.179                       | -0.604 | -1.174                        | -1.262         | -1.828 |
| [PPh <sub>4</sub> ] <sub>2</sub> [ <b>5a</b> ] | 0.203                        | -0.255                       | -0.617 | -1.223                        | -1.455         | -1.861 |
| [PPh <sub>4</sub> ] <sub>2</sub> [ <b>5b</b> ] | 0.191                        | -0.303                       | -0.760 | - <sup>c</sup>                | -1.485         | -1.864 |
| [PPh <sub>4</sub> ] <sub>2</sub> [ <b>5c</b> ] | 0.198                        | -0.279                       | -0.683 | -1.151                        | -1.396         | -1.783 |

<sup>a</sup>  $E_p^{\text{ox}}$  = oxidative peak potential. <sup>b</sup>  $E_p^{\text{red}}$  = reductive peak potential. <sup>c</sup> Difficult to determine.

**Table S2.** Differential Pulse Voltammetry of [PPh<sub>4</sub>]<sub>2</sub>[**1**], [PPh<sub>4</sub>]<sub>2</sub>[**2a**], [PPh<sub>4</sub>]<sub>2</sub>[**2b**], [PPh<sub>4</sub>]<sub>2</sub>[**2c**], [PPh<sub>4</sub>]<sub>2</sub>[**3a**], [PPh<sub>4</sub>]<sub>2</sub>[**3b**], [PPh<sub>4</sub>]<sub>2</sub>[**5a**], [PPh<sub>4</sub>]<sub>2</sub>[**5b**], and [PPh<sub>4</sub>]<sub>2</sub>[**5c**].

| Compound                                       | Oxidation Process             |                               | Reduction Process |                               |        |
|------------------------------------------------|-------------------------------|-------------------------------|-------------------|-------------------------------|--------|
|                                                | $E_p^{\text{red}}/\text{V}^a$ | $E_p^{\text{red}}/\text{V}^b$ |                   | $E_p^{\text{red}}/\text{V}^a$ |        |
| [PPh <sub>4</sub> ] <sub>2</sub> [ <b>1</b> ]  | 0.090                         |                               | -1.178            | -1.474                        | -1.798 |
| [PPh <sub>4</sub> ] <sub>2</sub> [ <b>2a</b> ] | 0.134                         | -0.866                        | -1.086            | -1.326                        | -1.770 |
| [PPh <sub>4</sub> ] <sub>2</sub> [ <b>2b</b> ] | 0.139                         | -0.577                        | -1.141            | -1.405                        | -1.781 |
| [PPh <sub>4</sub> ] <sub>2</sub> [ <b>2c</b> ] | 0.132                         | -0.632                        | -1.184            | -1.428                        | -1.824 |
| [PPh <sub>4</sub> ] <sub>2</sub> [ <b>3a</b> ] | 0.180                         | -0.540                        | -1.124            | -1.396                        | -1.776 |
| [PPh <sub>4</sub> ] <sub>2</sub> [ <b>3b</b> ] | 0.202                         | -0.618                        | -1.134            | -1.394                        | -1.778 |
| [PPh <sub>4</sub> ] <sub>2</sub> [ <b>5a</b> ] | 0.200                         | -0.870                        | -1.146            | -1.426                        | -1.770 |
| [PPh <sub>4</sub> ] <sub>2</sub> [ <b>5b</b> ] | 0.166                         | -0.718                        | -1.222            | -1.458                        | -1.826 |
| [PPh <sub>4</sub> ] <sub>2</sub> [ <b>5c</b> ] | 0.162                         | -0.636                        | -1.116            | -1.356                        | -1.748 |

<sup>a</sup> $E_p^{\text{red}}$  = The reductive peak potential of Ru atoms. <sup>b</sup>The reductive peak potential of Cu atom (desorption).

**Table S3.** Selected Bond Distances (Å) and Bond Angles (deg) for [PPh<sub>4</sub>]<sub>2</sub>[**1**]·CH<sub>2</sub>Cl<sub>2</sub>, [PPh<sub>4</sub>]<sub>2</sub>[**2a**], [PPh<sub>4</sub>]<sub>2</sub>[**2b**], [PPh<sub>4</sub>]<sub>2</sub>[**2c**], [PPh<sub>4</sub>]<sub>2</sub>[**3b**], [PPh<sub>4</sub>]<sub>2</sub>[**4b**], and [PPh<sub>4</sub>]<sub>2</sub>[**5c**].

| [PPh <sub>4</sub> ] <sub>2</sub> [ <b>1</b> ]·CH <sub>2</sub> Cl <sub>2</sub> |           |                   |           |
|-------------------------------------------------------------------------------|-----------|-------------------|-----------|
| Te(1)—Ru(1)                                                                   | 2.6650(7) | Ru(1)—Ru(5)       | 2.8427(7) |
| Te(1)—Ru(2)                                                                   | 2.7229(7) | Ru(2)—Ru(3)       | 2.8155(7) |
| Te(1)—Ru(3)                                                                   | 2.7481(7) | Ru(2)—Ru(5)       | 2.8693(7) |
| Te(1)—Ru(4)                                                                   | 2.6858(7) | Ru(3)—Ru(4)       | 2.8456(7) |
| Ru(1)—Ru(2)                                                                   | 2.8772(7) | Ru(3)—Ru(5)       | 2.8815(7) |
| Ru(1)—Ru(4)                                                                   | 2.8990(7) | Ru(4)—Ru(5)       | 2.8412(8) |
| Ru(1)—Ru(2)—Ru(3)                                                             | 90.72(2)  | Ru(2)—Ru(1)—Ru(4) | 88.65(2)  |
| Ru(1)—Ru(4)—Ru(3)                                                             | 89.68(2)  | Ru(2)—Ru(3)—Ru(4) | 90.95(2)  |
| [PPh <sub>4</sub> ] <sub>2</sub> [ <b>2a</b> ]                                |           |                   |           |
| Te(1)—Ru(1)                                                                   | 2.6764(4) | Ru(2)—Ru(5)       | 2.9102(5) |
| Te(1)—Ru(2)                                                                   | 2.7021(5) | Ru(3)—Ru(4)       | 2.8348(5) |
| Te(1)—Ru(3)                                                                   | 2.7463(4) | Ru(3)—Ru(5)       | 2.8554(5) |
| Te(1)—Ru(4)                                                                   | 2.6799(4) | Ru(4)—Ru(5)       | 2.8686(5) |
| Ru(1)—Ru(2)                                                                   | 2.8360(5) | Ru(1)—Cu(1)       | 2.6284(6) |
| Ru(1)—Ru(4)                                                                   | 3.0364(5) | Ru(4)—Cu(1)       | 2.6229(6) |
| Ru(1)—Ru(5)                                                                   | 2.8818(5) | Ru(5)—Cu(1)       | 2.7893(7) |
| Ru(2)—Ru(3)                                                                   | 2.8209(5) | Cu(1)—Cl(1)       | 2.189(1)  |
| Ru(1)—Ru(2)—Ru(3)                                                             | 92.18(1)  | Cl(1)—Cu(1)—Ru(4) | 139.84(4) |
| Ru(1)—Ru(4)—Ru(3)                                                             | 87.85(1)  | Cl(1)—Cu(1)—Ru(5) | 146.43(5) |
| Ru(2)—Ru(1)—Ru(4)                                                             | 87.79(1)  | Ru(1)—Cu(1)—Ru(4) | 70.65(2)  |
| Ru(2)—Ru(3)—Ru(4)                                                             | 92.16(1)  | Ru(1)—Cu(1)—Ru(5) | 64.19(2)  |
| Cl(1)—Cu(1)—Ru(1)                                                             | 136.48(5) | Ru(4)—Cu(1)—Ru(5) | 63.93(2)  |
| [PPh <sub>4</sub> ] <sub>2</sub> [ <b>2b</b> ]                                |           |                   |           |
| Te(1)—Ru(1)                                                                   | 2.6761(7) | Ru(2)—Ru(5)       | 2.9085(7) |
| Te(1)—Ru(2)                                                                   | 2.6982(8) | Ru(3)—Ru(4)       | 2.8332(8) |
| Te(1)—Ru(3)                                                                   | 2.7475(7) | Ru(3)—Ru(5)       | 2.8545(8) |
| Te(1)—Ru(4)                                                                   | 2.6786(6) | Ru(4)—Ru(5)       | 2.8740(8) |
| Ru(1)—Ru(2)                                                                   | 2.8347(8) | Ru(1)—Cu(1)       | 2.6277(9) |
| Ru(1)—Ru(4)                                                                   | 3.0349(7) | Ru(4)—Cu(1)       | 2.621(1)  |

|                   |           |                   |           |
|-------------------|-----------|-------------------|-----------|
| Ru(1)—Ru(5)       | 2.8799(8) | Ru(5)—Cu(1)       | 2.761(1)  |
| Ru(2)—Ru(3)       | 2.8200(8) | Br(1)—Cu(1)       | 2.313(1)  |
| Ru(1)—Ru(2)—Ru(3) | 92.17(2)  | Ru(1)—Cu(1)—Ru(5) | 64.56(2)  |
| Ru(1)—Ru(4)—Ru(3) | 87.86(2)  | Ru(4)—Cu(1)—Ru(5) | 64.50(3)  |
| Ru(2)—Ru(1)—Ru(4) | 87.78(2)  | Br(1)—Cu(1)—Ru(1) | 136.74(4) |
| Ru(2)—Ru(3)—Ru(4) | 92.15(2)  | Br(1)—Cu(1)—Ru(4) | 139.47(4) |
| Ru(1)—Cu(1)—Ru(4) | 70.65(3)  | Br(1)—Cu(1)—Ru(5) | 145.93(5) |

---

[PPh<sub>4</sub>]<sub>2</sub>[**2c**]

---

|                   |          |                   |           |
|-------------------|----------|-------------------|-----------|
| Te(1)—Ru(1)       | 2.695(1) | Ru(2)—Ru(5)       | 2.848(1)  |
| Te(1)—Ru(2)       | 2.746(2) | Ru(3)—Ru(4)       | 2.850(2)  |
| Te(1)—Ru(3)       | 2.700(1) | Ru(3)—Ru(5)       | 2.860(2)  |
| Te(1)—Ru(4)       | 2.690(1) | Ru(4)—Ru(5)       | 2.889(2)  |
| Ru(1)—Ru(2)       | 2.810(2) | Ru(1)—Cu(1)       | 2.667(2)  |
| Ru(1)—Ru(4)       | 2.997(2) | Ru(4)—Cu(1)       | 2.658(2)  |
| Ru(1)—Ru(5)       | 2.905(2) | Ru(5)—Cu(1)       | 2.693(2)  |
| Ru(2)—Ru(3)       | 2.839(2) | I(1)—Cu(1)        | 2.486(2)  |
| Ru(1)—Ru(2)—Ru(3) | 91.82(5) | Ru(1)—Cu(1)—Ru(5) | 65.65(5)  |
| Ru(1)—Ru(4)—Ru(3) | 87.84(4) | Ru(4)—Cu(1)—Ru(5) | 65.35(5)  |
| Ru(2)—Ru(1)—Ru(4) | 88.95(4) | I(1)—Cu(1)—Ru(1)  | 140.53(8) |
| Ru(2)—Ru(3)—Ru(4) | 91.37(4) | I(1)—Cu(1)—Ru(4)  | 144.17(8) |
| Ru(1)—Cu(1)—Ru(4) | 68.51(5) | I(1)—Cu(1)—Ru(5)  | 136.75(8) |

---

[PPh<sub>4</sub>]<sub>2</sub>[**3b**]

---

|             |          |              |          |
|-------------|----------|--------------|----------|
| Te(1)—Ru(1) | 2.677(3) | Ru(4)—Ru(5)  | 2.827(2) |
| Te(1)—Ru(2) | 2.675(2) | Cu(1)—Ru(1)  | 2.636(2) |
| Te(1)—Ru(3) | 2.735(1) | Cu(1)—Ru(2)  | 2.617(2) |
| Te(1)—Ru(4) | 2.715(2) | Cu(2a)—Ru(1) | 2.651(2) |
| Ru(1)—Ru(2) | 3.071(2) | Cu(2a)—Ru(2) | 2.633(3) |
| Ru(1)—Ru(4) | 2.809(2) | Cu(2a)—Ru(5) | 2.682(2) |
| Ru(1)—Ru(5) | 2.908(1) | Cu(1)—Cu(2)  | 2.773(2) |
| Ru(2)—Ru(3) | 2.806(2) | Cu(1)—Cu(2a) | 2.598(3) |
| Ru(2)—Ru(5) | 2.929(2) | Br(1)—Cu(1)  | 2.324(2) |
| Ru(3)—Ru(4) | 2.818(2) | Br(1)—Cu(2)  | 2.331(3) |
| Ru(3)—Ru(5) | 2.800(4) |              |          |

|                     |          |                     |           |
|---------------------|----------|---------------------|-----------|
| Ru(1)—Ru(2)—Ru(3)   | 87.24(5) | Ru(2a)—Cu(2)—Ru(5a) | 66.88(6)  |
| Ru(1)—Ru(4)—Ru(3)   | 92.31(5) | Cu(1)—Cu(2)—Cu(1a)  | 72.05(8)  |
| Ru(2)—Ru(1)—Ru(4)   | 87.59(5) | Cu(2)—Cu(1)—Cu(2a)  | 107.95(8) |
| Ru(2)—Ru(3)—Ru(4)   | 92.84(5) | Cu(1)—Ru(1)—Cu(2a)  | 58.87(5)  |
| Ru(1)—Cu(1)—Ru(2)   | 71.54(5) | Cu(1)—Ru(2)—Cu(2a)  | 59.33(6)  |
| Ru(1a)—Cu(2)—Ru(2a) | 71.06(7) | Cu(1)—Br(1)—Cu(2)   | 73.12(7)  |
| Ru(1a)—Cu(2)—Ru(5a) | 66.08(4) |                     |           |

---

[PPh<sub>4</sub>]<sub>2</sub>[**4b**]

---

|                   |          |                   |           |
|-------------------|----------|-------------------|-----------|
| Te(1)—Ru(1)       | 2.674(1) | Ru(3)—Ru(5)       | 2.883(2)  |
| Te(1)—Ru(2)       | 2.703(1) | Ru(4)—Ru(5)       | 2.904(1)  |
| Te(1)—Ru(3)       | 2.744(1) | Ru(1)—Cu(1)       | 2.671(2)  |
| Te(1)—Ru(4)       | 2.691(1) | Ru(1)—Cu(2)       | 2.671(2)  |
| Ru(1)—Ru(2)       | 2.984(1) | Ru(2)—Cu(2)       | 2.655(2)  |
| Ru(1)—Ru(4)       | 3.016(1) | Ru(4)—Cu(1)       | 2.627(2)  |
| Ru(1)—Ru(5)       | 2.909(1) | Ru(5)—Cu(1)       | 2.736(2)  |
| Ru(2)—Ru(3)       | 2.807(1) | Ru(5)—Cu(2)       | 2.665(2)  |
| Ru(2)—Ru(5)       | 2.899(1) | Br(1)—Cu(1)       | 2.299(2)  |
| Ru(3)—Ru(4)       | 2.803(1) | Br(2)—Cu(2)       | 2.273(3)  |
| Ru(1)—Ru(2)—Ru(3) | 90.46(3) | Ru(2)—Cu(2)—Ru(5) | 66.04(5)  |
| Ru(1)—Ru(4)—Ru(3) | 89.89(3) | Cu(1)—Ru(1)—Cu(2) | 95.58(6)  |
| Ru(2)—Ru(3)—Ru(4) | 93.66(4) | Cu(1)—Ru(5)—Cu(2) | 94.20(6)  |
| Ru(2)—Ru(1)—Ru(4) | 85.99(3) | Br(1)—Cu(1)—Ru(1) | 143.47(8) |
| Ru(1)—Cu(1)—Ru(4) | 69.39(4) | Br(1)—Cu(1)—Ru(4) | 138.33(8) |
| Ru(1)—Cu(1)—Ru(5) | 65.07(4) | Br(1)—Cu(1)—Ru(5) | 139.75(8) |
| Ru(4)—Cu(1)—Ru(5) | 65.52(4) | Br(2)—Cu(2)—Ru(1) | 132.7(1)  |
| Ru(1)—Cu(2)—Ru(2) | 68.15(5) | Br(2)—Cu(2)—Ru(2) | 138.0(1)  |
| Ru(1)—Cu(2)—Ru(5) | 66.06(5) | Br(2)—Cu(2)—Ru(5) | 150.0(1)  |

---

[PPh<sub>4</sub>]<sub>2</sub>[**5c**]

---

|              |           |              |           |
|--------------|-----------|--------------|-----------|
| Te(1)—Ru(1)  | 2.7372(8) | Ru(1)—Ru(2a) | 2.8023(9) |
| Te(1)—Ru(2)  | 2.7421(8) | Ru(1)—Cu(1)  | 2.614(1)  |
| Te(1)—Ru(1a) | 2.7474(8) | Ru(2)—Cu(1)  | 2.601(1)  |
| Te(1)—Ru(2a) | 2.7395(9) | I(1)—Cu(1)   | 2.441(1)  |
| Ru(1)—Ru(2)  | 3.0121(9) |              |           |

|                    |          |                  |           |
|--------------------|----------|------------------|-----------|
| Ru(1a)—Ru(2)—Ru(1) | 90.06(2) | I(1)—Cu(1)—Ru(1) | 140.95(5) |
| Ru(2)—Ru(1)—Ru(2a) | 89.94(2) | I(1)—Cu(1)—Ru(2) | 148.49(5) |
| Ru(1)—Cu(1)—Ru(2)  | 70.56(3) |                  |           |

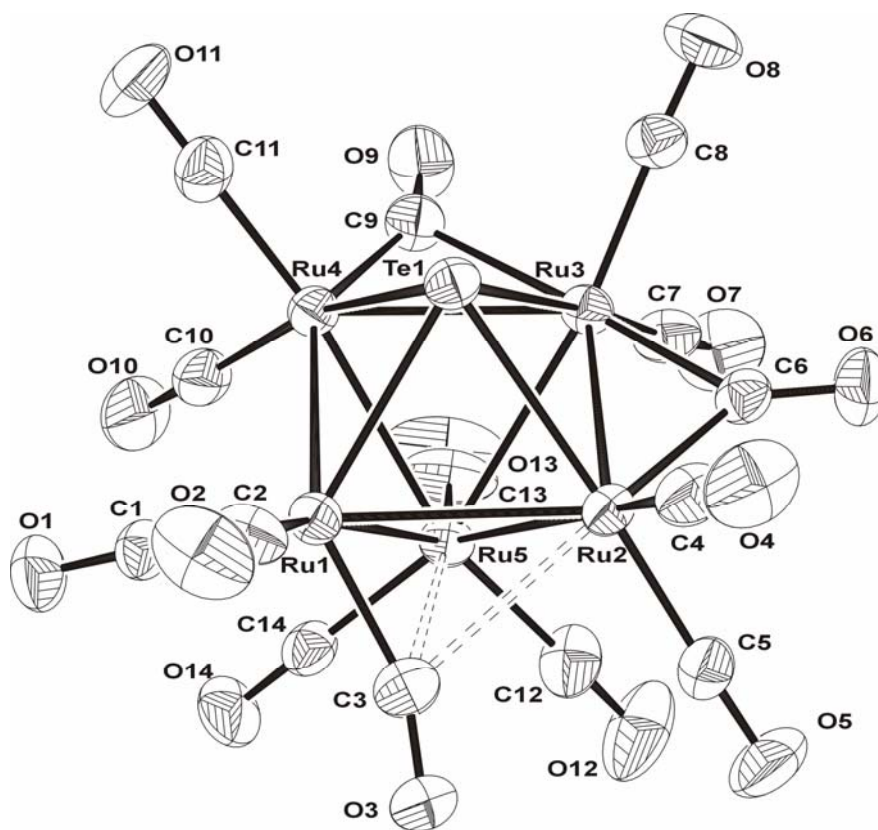

**Figure S1.** ORTEP diagram (30% thermal ellipsoids) showing the structure and atom labeling for the anion **1**.

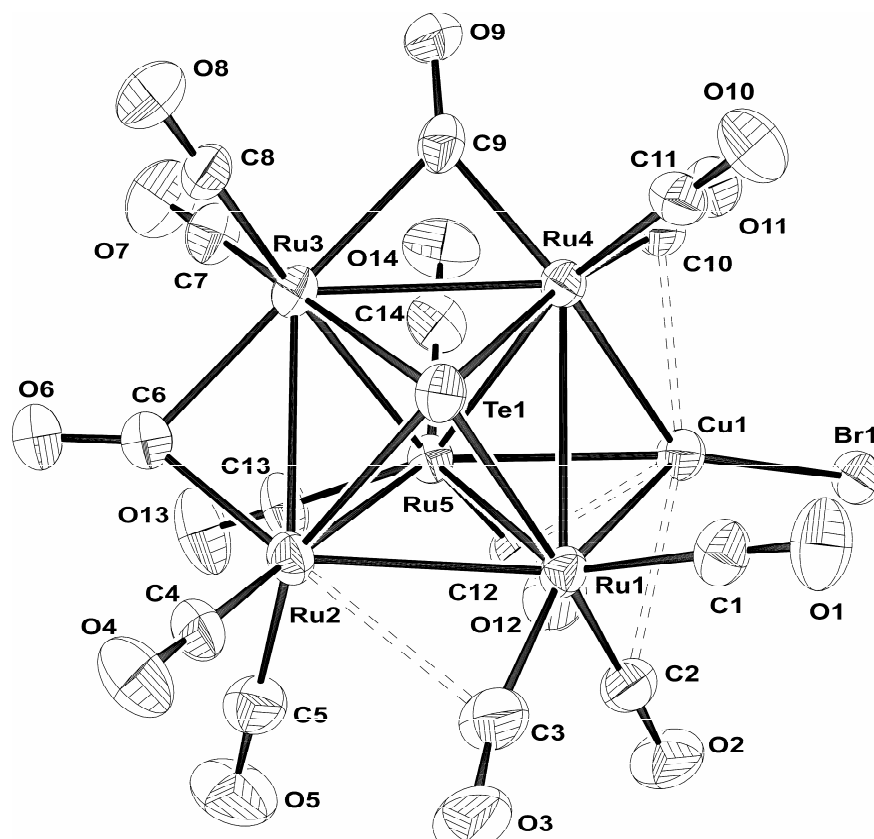

**Figure S2.** ORTEP diagram (30% thermal ellipsoids) showing the structure and atom labeling for the anion **2b**.



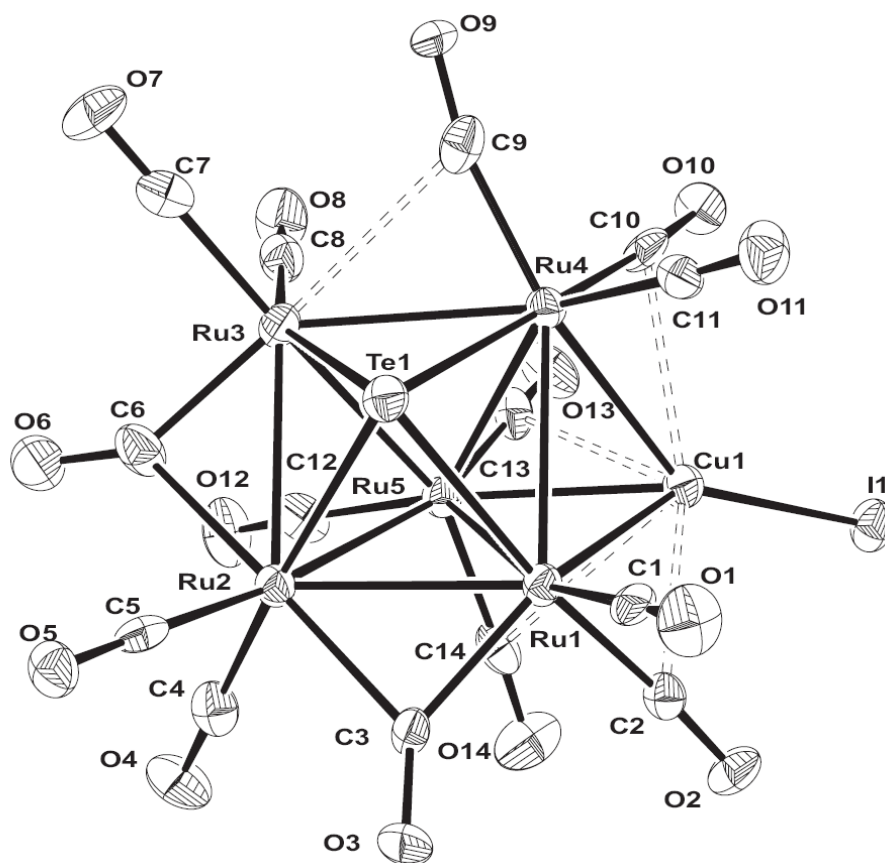

**Figure S3.** ORTEP diagram (30% thermal ellipsoids) showing the structure and atom labeling for the anion **2c**.

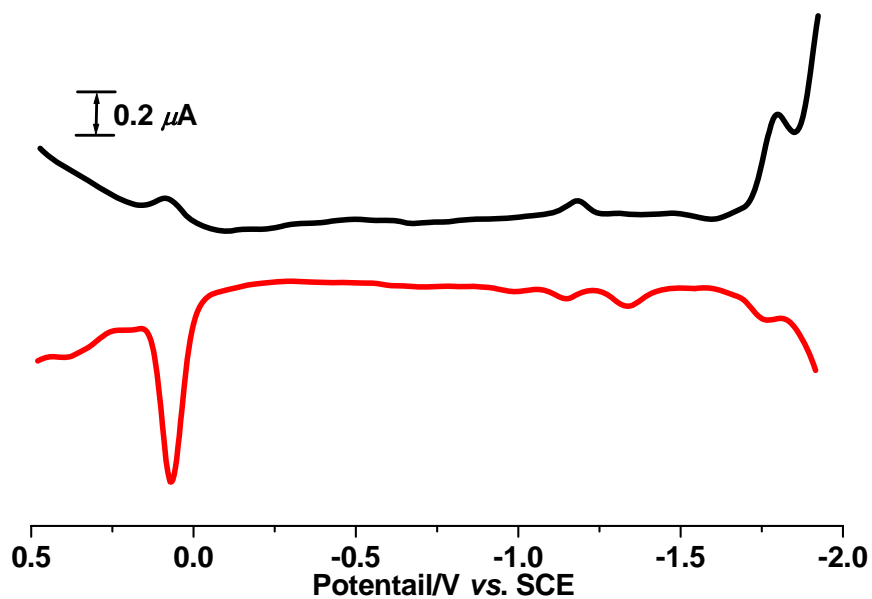

**Figure S4.** Differential pulse voltammetry in MeCN for  $[\text{PPh}_4]_2[\mathbf{1}]$ . Conditions: electrolyte, 0.1 M  $\text{Bu}_4\text{NClO}_4$ ; working electrode, glassy carbon; scan rate,  $100 \text{ mV s}^{-1}$ . Potentials are vs SCE.

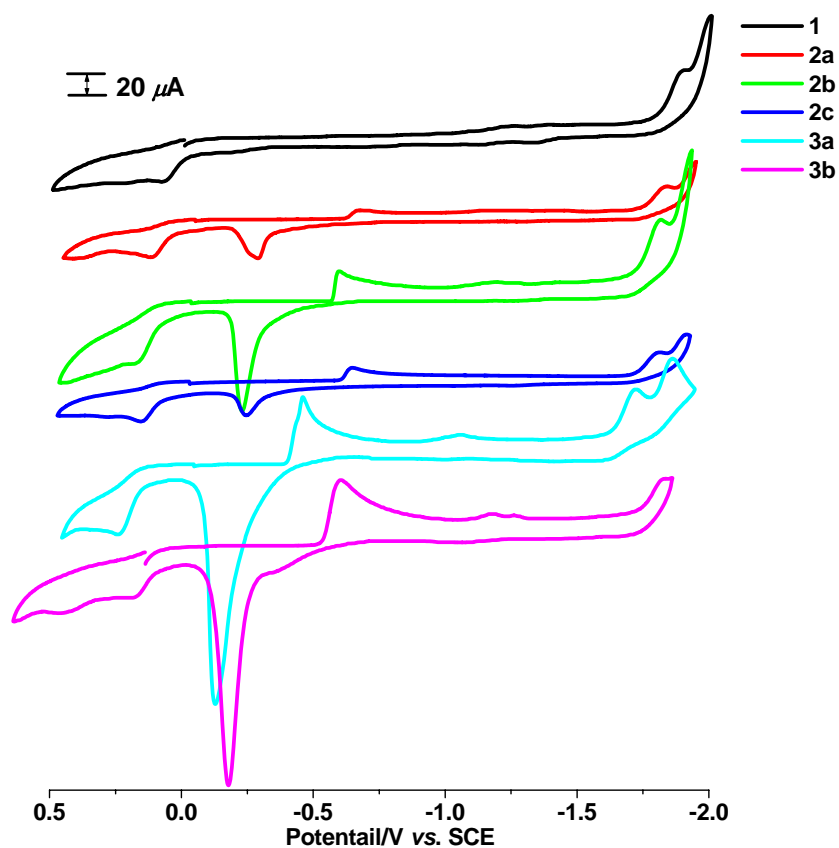

**Figure S5.** Cyclic voltammetry in MeCN for  $[\text{PPh}_4]_2[\mathbf{1}]$ ,  $[\text{PPh}_4]_2[\mathbf{2a}]$ ,  $[\text{PPh}_4]_2[\mathbf{2b}]$ ,  $[\text{PPh}_4]_2[\mathbf{2c}]$ ,  $[\text{PPh}_4]_2[\mathbf{3a}]$ , and  $[\text{PPh}_4]_2[\mathbf{3b}]$ . Conditions: electrolyte, 0.1 M  $\text{Bu}_4\text{NClO}_4$ ; working electrode, glassy carbon; scan rate,  $100 \text{ mV s}^{-1}$ . Potentials are vs SCE.

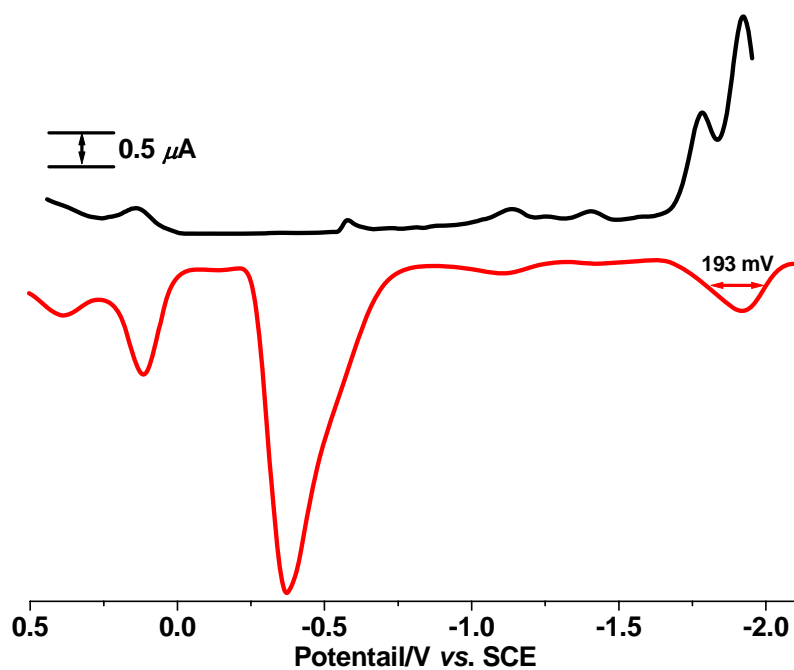

**Figure S6.** Differential pulse voltammetry in MeCN for  $[\text{PPh}_4]_2[\mathbf{2b}]$ . Conditions: electrolyte, 0.1 M  $\text{Bu}_4\text{NClO}_4$ ; working electrode, glassy carbon; scan rate,  $100 \text{ mV s}^{-1}$ . Potentials are vs SCE.

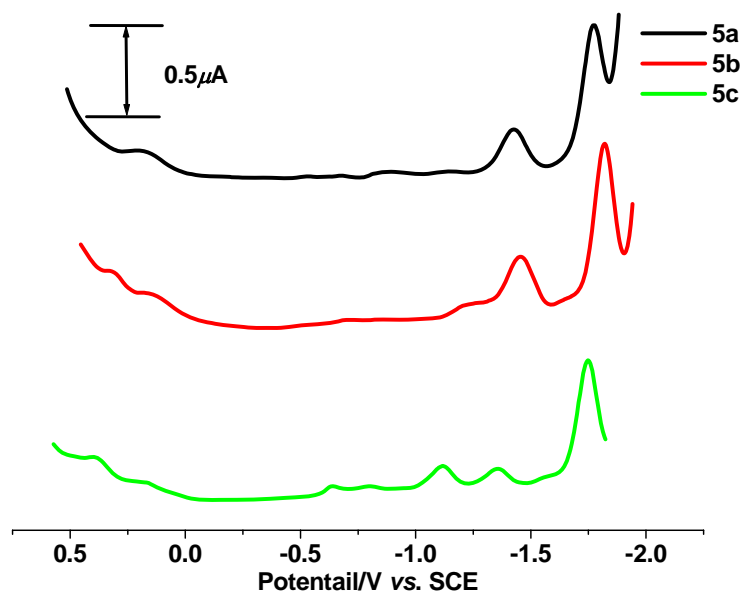

**Figure S7.** Differential pulse voltammetry in MeCN for  $[\text{PPh}_4]_2[\mathbf{5a}]$ ,  $[\text{PPh}_4]_2[\mathbf{5b}]$ , and  $[\text{PPh}_4]_2[\mathbf{5c}]$ . Conditions: electrolyte, 0.1 M  $\text{Bu}_4\text{NClO}_4$ ; working electrode, glassy carbon; scan rate,  $100 \text{ mV s}^{-1}$ . Potentials are vs SCE.

## Computational Details:

All calculations were performed using the LanL2DZ basis sets and applying the Becke-3-parameter density functional theory (DFT) and the Lee-Yang-Parr correlation functional (B3LYP).

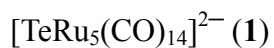

$$E = -2064.3928976 \text{ a.u.}$$

|    | x        | y        | z       |
|----|----------|----------|---------|
| Te | 8.70284  | 13.41216 | 6.95279 |
| Ru | 6.13072  | 14.02973 | 6.62844 |
| Ru | 7.33911  | 11.85469 | 5.18357 |
| Ru | 9.40986  | 13.54548 | 4.30037 |
| Ru | 8.27266  | 15.74777 | 5.69813 |
| Ru | 6.667    | 14.30516 | 3.85059 |
| O  | 4.62255  | 16.60698 | 7.02587 |
| O  | 5.19757  | 13.09417 | 9.34455 |
| O  | 3.98255  | 12.48923 | 5.20014 |
| O  | 7.69721  | 9.50197  | 7.02368 |
| O  | 5.68663  | 10.06629 | 3.42895 |
| O  | 9.57319  | 10.58412 | 3.66017 |
| O  | 10.03402 | 13.5645  | 1.36547 |
| O  | 12.35226 | 13.16438 | 4.8555  |
| O  | 10.56406 | 16.52341 | 3.92628 |
| O  | 6.78     | 18.15983 | 4.70718 |
| O  | 9.5839   | 17.30762 | 7.92673 |
| O  | 5.68043  | 12.53823 | 1.60541 |
| O  | 7.93525  | 16.12498 | 1.83881 |
| O  | 4.15069  | 15.99751 | 3.88266 |
| C  | 5.22826  | 15.64667 | 6.85791 |
| C  | 5.59129  | 13.43466 | 8.33681 |
| C  | 4.96495  | 12.98327 | 5.53388 |
| C  | 7.53987  | 10.41329 | 6.35622 |
| C  | 6.30317  | 10.7755  | 4.0637  |
| C  | 9.03113  | 11.51463 | 4.15095 |
| C  | 9.77544  | 13.61373 | 2.47356 |

|   |         |          |         |
|---|---------|----------|---------|
| C | 11.2446 | 13.31598 | 4.69191 |
| C | 9.76089 | 15.88748 | 4.4716  |
| C | 7.33508 | 17.22151 | 5.08672 |
| C | 9.08117 | 16.70163 | 7.10439 |
| C | 6.05764 | 13.1477  | 2.48447 |
| C | 7.52633 | 15.40817 | 2.62407 |
| C | 5.09487 | 15.34922 | 3.90229 |

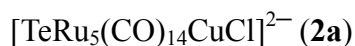

E = -2275.6222856 a.u.

|    | x        | y       | z        |
|----|----------|---------|----------|
| Te | -0.12504 | 3.85161 | 4.70477  |
| Ru | 1.59587  | 4.84297 | 6.49732  |
| Ru | 0.52636  | 6.45934 | 4.42845  |
| Ru | -2.11325 | 5.71704 | 5.07285  |
| Ru | -1.241   | 3.98925 | 7.13498  |
| Ru | -0.45229 | 6.74823 | 7.15194  |
| Cu | 0.51607  | 4.82518 | 8.88761  |
| Cl | 1.16729  | 4.37786 | 10.93657 |
| O  | 2.50179  | 2.00727 | 7.09153  |
| O  | 3.44597  | 6.18604 | 8.50731  |
| O  | 3.80097  | 5.30579 | 4.47163  |
| O  | 2.28901  | 8.90096 | 4.72535  |
| O  | 1.55539  | 6.04478 | 1.61764  |
| O  | -1.63611 | 7.92977 | 2.94931  |
| O  | -4.24116 | 7.79248 | 5.59584  |
| O  | -3.78996 | 4.39993 | 2.91707  |
| O  | -4.22438 | 4.13374 | 6.73127  |
| O  | -2.24106 | 3.98718 | 9.99318  |
| O  | -1.29479 | 0.95927 | 7.13078  |
| O  | 0.98306  | 7.95846 | 9.55162  |
| O  | -0.84849 | 9.53444 | 6.02478  |
| O  | -3.07919 | 6.98904 | 8.67272  |
| C  | 2.16154  | 3.07735 | 6.88266  |
| C  | 2.66937  | 5.70133 | 7.80783  |
| C  | 2.89973  | 5.18836 | 5.1627   |

|   |          |         |         |
|---|----------|---------|---------|
| C | 1.60067  | 7.99598 | 4.63003 |
| C | 1.17311  | 6.18692 | 2.69139 |
| C | -1.20599 | 7.15855 | 3.71608 |
| C | -3.42063 | 6.9961  | 5.42483 |
| C | -3.1453  | 4.9076  | 3.71327 |
| C | -3.09376 | 4.37874 | 6.52942 |
| C | -1.76857 | 4.03309 | 8.94606 |
| C | -1.28219 | 2.10351 | 7.13498 |
| C | 0.52856  | 7.40621 | 8.63767 |
| C | -0.66322 | 8.45642 | 6.38364 |
| C | -2.0982  | 6.84203 | 8.08958 |

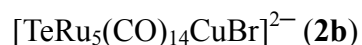

E = -2273.8245727 a.u.

|    | x        | y       | z        |
|----|----------|---------|----------|
| Te | -0.24521 | 3.91718 | 4.70512  |
| Ru | 1.50128  | 4.88389 | 6.48767  |
| Ru | 0.43755  | 6.51254 | 4.42559  |
| Ru | -2.21078 | 5.79956 | 5.0814   |
| Ru | -1.34514 | 4.05972 | 7.1432   |
| Ru | -0.52891 | 6.8154  | 7.1521   |
| Br | 1.12109  | 4.43211 | 11.04377 |
| Cu | 0.42727  | 4.89162 | 8.88578  |
| O  | 2.41262  | 2.07963 | 7.13586  |
| O  | 3.39634  | 6.24068 | 8.4311   |
| O  | 3.7039   | 5.26941 | 4.43943  |
| O  | 1.49374  | 6.06562 | 1.63283  |
| O  | 2.20516  | 8.9379  | 4.71345  |
| O  | -1.71439 | 7.9903  | 2.95209  |
| O  | -4.30896 | 7.89116 | 5.6132   |
| O  | -3.90668 | 4.54687 | 2.9309   |
| O  | -4.32897 | 4.22044 | 6.76296  |
| O  | -1.42444 | 1.0521  | 7.1401   |
| O  | -2.33281 | 4.01725 | 10.0032  |
| O  | 0.93262  | 8.02781 | 9.51589  |
| O  | -0.93333 | 9.59211 | 6.06379  |



|   |          |         |         |
|---|----------|---------|---------|
| O | -3.1148  | 7.05252 | 8.72773 |
| C | 2.05314  | 3.12592 | 6.90139 |
| C | 2.61645  | 5.76509 | 7.75876 |
| C | 2.78909  | 5.21136 | 5.13155 |
| C | 1.09159  | 6.23978 | 2.7049  |
| C | 1.51882  | 8.04255 | 4.63577 |
| C | -1.27301 | 7.23695 | 3.71483 |
| C | -3.49798 | 7.1003  | 5.44512 |
| C | -3.26336 | 5.00817 | 3.72754 |
| C | -3.20919 | 4.45622 | 6.56098 |
| C | -1.85814 | 4.07843 | 8.9509  |
| C | -1.40511 | 2.18234 | 7.1401  |
| C | 0.46758  | 7.4772  | 8.59495 |
| C | -0.74786 | 8.51635 | 6.40137 |
| C | -2.15782 | 6.92793 | 8.102   |

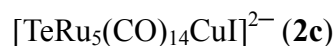

E = -2272.0389925 a.u.

|    | x        | y        | z        |
|----|----------|----------|----------|
| I  | 2.11271  | 9.28288  | 16.47594 |
| Te | 3.21259  | 2.66338  | 17.91083 |
| Ru | 4.28603  | 5.12821  | 17.71618 |
| Ru | 5.26703  | 3.02976  | 16.1257  |
| Ru | 2.64871  | 2.31572  | 15.29322 |
| Ru | 1.51127  | 4.4374   | 16.81868 |
| Ru | 3.59803  | 4.9839   | 14.89705 |
| Cu | 2.60306  | 6.8476   | 16.56651 |
| O  | 4.29895  | 5.20603  | 20.75508 |
| O  | 5.29733  | 7.97667  | 17.80632 |
| O  | 7.26558  | 4.7198   | 17.77413 |
| O  | 7.5538   | 3.60799  | 14.21587 |
| O  | 6.9145   | 0.7306   | 17.20755 |
| O  | 4.91867  | 0.8348   | 13.96692 |
| O  | 1.44379  | -0.49174 | 15.43701 |
| O  | 1.19869  | 2.84186  | 12.68569 |
| O  | -0.60833 | 2.27661  | 16.48217 |

|   |          |         |          |
|---|----------|---------|----------|
| O | -0.45774 | 6.34717 | 15.52071 |
| O | 0.54042  | 5.15166 | 19.58116 |
| O | 4.72231  | 3.75862 | 12.36806 |
| O | 1.55599  | 6.45511 | 13.16427 |
| O | 5.72246  | 7.13445 | 14.74811 |
| C | 4.27253  | 5.17371 | 19.63266 |
| C | 4.84918  | 6.93878 | 17.69258 |
| C | 6.17892  | 4.48186 | 17.42431 |
| C | 6.67463  | 3.41076 | 14.89189 |
| C | 6.26521  | 1.59126 | 16.82984 |
| C | 4.41014  | 1.60426 | 14.68801 |
| C | 1.89758  | 0.5524  | 15.40052 |
| C | 1.75345  | 2.6444  | 13.69651 |
| C | 0.27343  | 2.99155 | 16.5165  |
| C | 0.32096  | 5.6879  | 15.95637 |
| C | 0.92461  | 4.91019 | 18.53814 |
| C | 4.29852  | 4.1699  | 13.33811 |
| C | 2.29121  | 5.88929 | 13.90468 |
| C | 4.89432  | 6.32189 | 14.8597  |

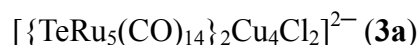

E = -4943.5672795 a.u.

|    | x       | y        | z       |
|----|---------|----------|---------|
| Te | 3.64991 | 7.73101  | 5.46703 |
| Ru | 6.10096 | 8.39975  | 6.35579 |
| Ru | 4.95187 | 9.73196  | 4.16011 |
| Ru | 4.35192 | 7.29652  | 2.85227 |
| Ru | 5.38616 | 5.75757  | 4.9674  |
| Ru | 6.98854 | 7.83444  | 3.64657 |
| Cu | 5.8949  | 6.04565  | 7.52378 |
| Cu | 7.8029  | 6.44442  | 5.79059 |
| Cl | 9.8865  | 5.6442   | 5.9526  |
| O  | 8.80437 | 8.91411  | 7.61747 |
| O  | 4.96006 | 8.9185   | 9.11376 |
| O  | 6.22478 | 11.40759 | 6.41769 |
| O  | 6.564   | 11.95922 | 2.94214 |

|    |          |          |          |
|----|----------|----------|----------|
| O  | 2.51688  | 11.50577 | 4.54389  |
| O  | 4.14058  | 9.85397  | 1.21812  |
| O  | 1.41062  | 6.81425  | 2.19935  |
| O  | 5.44179  | 6.60805  | 0.11004  |
| O  | 4.71386  | 4.24173  | 2.45917  |
| O  | 7.31333  | 3.42478  | 4.91529  |
| O  | 3.50423  | 3.7784   | 6.30153  |
| O  | 9.59391  | 9.14421  | 4.51638  |
| O  | 7.38658  | 9.27457  | 0.99804  |
| O  | 8.15389  | 5.33355  | 2.37358  |
| C  | 7.81565  | 8.64908  | 7.10088  |
| C  | 5.36869  | 8.65409  | 8.08057  |
| C  | 5.95859  | 10.36025 | 5.97751  |
| C  | 5.98189  | 11.09793 | 3.38843  |
| C  | 3.42297  | 10.83541 | 4.41703  |
| C  | 4.30766  | 9.25807  | 2.21157  |
| C  | 2.4807   | 6.98748  | 2.44083  |
| C  | 5.02647  | 6.88274  | 1.13406  |
| C  | 4.77673  | 5.18638  | 3.15     |
| C  | 6.67038  | 4.37929  | 4.96725  |
| C  | 4.19599  | 4.54812  | 5.84454  |
| C  | 8.60399  | 8.64056  | 4.27184  |
| C  | 7.17145  | 8.7607   | 1.98232  |
| C  | 7.73113  | 6.24457  | 2.90546  |
| Cu | 6.9943   | 4.42313  | 9.49326  |
| Cl | 4.9107   | 5.22336  | 9.33125  |
| Ru | 8.69625  | 2.46781  | 8.92806  |
| Ru | 9.41104  | 5.10998  | 10.31644 |
| Ru | 7.80867  | 3.03311  | 11.63727 |
| Cu | 8.9023   | 4.8219   | 7.76007  |
| C  | 6.98156  | 2.21847  | 8.18297  |
| C  | 8.12682  | 6.48827  | 10.3166  |
| C  | 6.19321  | 2.22699  | 11.01201 |
| Te | 11.14729 | 3.13655  | 9.81682  |
| Ru | 9.84533  | 1.13559  | 11.12374 |
| C  | 9.42851  | 2.21347  | 7.20328  |
| C  | 8.83862  | 0.5073   | 9.30634  |

|    |          |          |          |
|----|----------|----------|----------|
| Ru | 10.44528 | 3.57103  | 12.43158 |
| C  | 10.02047 | 5.68117  | 12.13385 |
| C  | 10.60121 | 6.31943  | 9.4393   |
| C  | 7.62576  | 2.10686  | 13.30153 |
| C  | 7.06607  | 4.62299  | 12.37839 |
| O  | 5.99283  | 1.95344  | 7.66638  |
| O  | 7.48388  | 7.44278  | 10.36856 |
| O  | 5.20329  | 1.72334  | 10.76747 |
| C  | 8.81531  | -0.23037 | 11.89542 |
| C  | 11.37423 | 0.03214  | 10.86682 |
| C  | 10.48955 | 1.60949  | 13.07228 |
| O  | 9.83715  | 1.94905  | 6.17009  |
| O  | 8.57243  | -0.54004 | 8.86616  |
| C  | 12.3165  | 3.88007  | 12.84302 |
| C  | 9.77073  | 3.98482  | 14.14979 |
| O  | 10.08335 | 6.62582  | 12.82468 |
| O  | 11.29298 | 7.08916  | 8.98232  |
| O  | 7.41063  | 1.59298  | 14.28581 |
| O  | 6.64332  | 5.53401  | 12.91027 |
| O  | 8.2332   | -1.09167 | 12.34171 |
| O  | 12.28032 | -0.63822 | 10.73996 |
| O  | 10.65663 | 1.01358  | 14.06573 |
| O  | 13.38659 | 4.05331  | 13.0845  |
| O  | 9.35541  | 4.25951  | 15.1738  |

[{TeRu<sub>5</sub>(CO)<sub>14</sub>}<sub>2</sub>Cu<sub>4</sub>Br<sub>2</sub>]<sup>2-</sup> (**3b**)

E = -4940.0052068 a.u.

|    | x        | y        | z       |
|----|----------|----------|---------|
| Te | 1.37784  | 12.98229 | 2.18324 |
| Ru | -1.05295 | 12.30231 | 1.28834 |
| Ru | -0.36779 | 14.94197 | 2.70059 |
| Ru | 0.67818  | 13.39412 | 4.79338 |
| Ru | 0.09733  | 10.96983 | 3.47891 |
| Ru | -1.95139 | 12.8489  | 3.99871 |
| Cu | -0.85431 | 14.67045 | 0.14408 |
| Cu | -1.85705 | 16.3069  | -1.8584 |

|    |          |          |          |
|----|----------|----------|----------|
| Br | 0.3173   | 15.48777 | -1.68728 |
| O  | -3.73539 | 11.77319 | 0.00611  |
| O  | 0.12013  | 11.79663 | -1.45305 |
| O  | -1.15515 | 9.30191  | 1.20858  |
| O  | -2.30853 | 17.2558  | 2.77317  |
| O  | 1.50785  | 16.95671 | 1.42554  |
| O  | 0.33107  | 16.44317 | 5.20714  |
| O  | -0.38227 | 14.05273 | 7.51887  |
| O  | 3.61865  | 13.89644 | 5.43479  |
| O  | 0.94459  | 10.83397 | 6.39433  |
| O  | -1.52008 | 8.72417  | 4.69987  |
| O  | 2.55179  | 9.21842  | 3.09708  |
| O  | -4.51749 | 11.50456 | 3.11542  |
| O  | -3.18024 | 15.31547 | 5.2927   |
| O  | -2.31319 | 11.40533 | 6.62657  |
| C  | -2.77424 | 12.08002 | 0.54547  |
| C  | -0.32837 | 12.05672 | -0.42476 |
| C  | -0.9061  | 10.35248 | 1.68529  |
| C  | -1.66476 | 16.28535 | 2.70594  |
| C  | 0.8102   | 16.1743  | 1.85947  |
| C  | 0.24407  | 15.52177 | 4.49513  |
| C  | 0.03647  | 13.78371 | 6.48447  |
| C  | 2.5406   | 13.71832 | 5.20561  |
| C  | 0.74733  | 11.4448  | 5.43938  |
| C  | -0.90198 | 9.59105  | 4.26441  |
| C  | 1.63232  | 9.88777  | 3.20709  |
| C  | -3.51288 | 12.0366  | 3.35683  |
| C  | -2.72809 | 14.43883 | 4.75334  |
| C  | -2.14454 | 11.95018 | 5.63037  |
| Cu | -2.76359 | 14.24567 | 1.8584   |
| Ru | -3.56769 | 18.25026 | -1.28834 |
| Ru | -4.25285 | 15.6106  | -2.70059 |
| Ru | -2.66925 | 17.70367 | -3.99871 |
| Cu | -3.76633 | 15.88212 | -0.14408 |
| Br | -4.93794 | 15.0648  | 1.68728  |
| Te | -5.99848 | 17.57028 | -2.18324 |
| Ru | -4.71797 | 19.58274 | -3.47891 |

|    |          |          |          |
|----|----------|----------|----------|
| C  | -1.8464  | 18.47255 | -0.54547 |
| C  | -4.29227 | 18.49585 | 0.42476  |
| C  | -3.71454 | 20.20009 | -1.68529 |
| Ru | -5.29882 | 17.15845 | -4.79338 |
| C  | -2.95588 | 14.26722 | -2.70594 |
| C  | -5.43085 | 14.37827 | -1.85947 |
| C  | -4.86471 | 15.0308  | -4.49513 |
| C  | -1.10777 | 18.51597 | -3.35683 |
| C  | -1.89255 | 16.11374 | -4.75334 |
| C  | -2.4761  | 18.60239 | -5.63037 |
| C  | -5.36797 | 19.10777 | -5.43938 |
| C  | -3.71866 | 20.96152 | -4.26441 |
| C  | -6.25296 | 20.6648  | -3.20709 |
| O  | -0.88525 | 18.77938 | -0.00611 |
| O  | -4.74077 | 18.75594 | 1.45305  |
| O  | -3.46549 | 21.25067 | -1.20858 |
| C  | -4.65711 | 16.76886 | -6.48447 |
| C  | -7.16124 | 16.83425 | -5.20561 |
| O  | -2.31211 | 13.29677 | -2.77317 |
| O  | -6.12849 | 13.59586 | -1.42554 |
| O  | -4.95171 | 14.1094  | -5.20714 |
| O  | -0.10315 | 19.04801 | -3.11542 |
| O  | -1.4404  | 15.2371  | -5.2927  |
| O  | -2.30745 | 19.14724 | -6.62657 |
| O  | -5.56523 | 19.7186  | -6.39433 |
| O  | -3.10056 | 21.8284  | -4.69987 |
| O  | -7.17244 | 21.33415 | -3.09708 |
| O  | -4.23837 | 16.49984 | -7.51887 |
| O  | -8.23929 | 16.65613 | -5.43479 |

$[\text{TeRu}_5(\text{CO})_{14}(\text{CuCl})_2]^{2-}$  (**4a**) (the Optimized Geometry)

E = -2486.772994 a.u.

|    | x        | y        | z        |
|----|----------|----------|----------|
| Te | -0.0137  | 1.120715 | -2.06804 |
| Ru | 0.017271 | -1.50706 | -1.24121 |
| Ru | 2.138675 | 0.669918 | -0.38402 |

|    |          |          |          |
|----|----------|----------|----------|
| Ru | -0.02554 | 2.440911 | 0.466591 |
| Ru | -2.15313 | 0.625175 | -0.38205 |
| Ru | 0.003958 | -0.34738 | 1.510035 |
| Cu | -2.01129 | -1.97096 | 0.506654 |
| Cu | 2.052858 | -1.92769 | 0.510246 |
| O  | -2.19216 | -2.20495 | -3.28544 |
| O  | 0.039562 | -4.42009 | -0.17582 |
| O  | 2.25405  | -2.16199 | -3.26974 |
| O  | 4.019536 | 1.331522 | -2.71966 |
| O  | 4.677771 | -0.08654 | 1.18149  |
| O  | 2.949337 | 3.330063 | 0.808885 |
| O  | -0.05353 | 5.237101 | -0.84315 |
| O  | -0.03796 | 3.641507 | 3.288549 |
| O  | -3.0181  | 3.270518 | 0.805753 |
| O  | -4.67207 | -0.18087 | 1.19147  |
| O  | -4.05124 | 1.239241 | -2.71674 |
| O  | 0.029684 | -3.05167 | 3.030196 |
| O  | 2.151735 | 0.717996 | 3.444936 |
| O  | -2.16225 | 0.675944 | 3.447161 |
| C  | -1.38434 | -1.9083  | -2.47629 |
| C  | 0.029106 | -3.2715  | -0.44524 |
| C  | 1.435821 | -1.88025 | -2.46566 |
| C  | 3.28872  | 1.06419  | -1.82154 |
| C  | 3.657073 | 0.087363 | 0.609164 |
| C  | 2.147258 | 2.496248 | 0.454918 |
| C  | -0.04279 | 4.160514 | -0.34959 |
| C  | -0.03302 | 3.150855 | 2.212022 |
| C  | -2.1993  | 2.452321 | 0.453625 |
| C  | -3.65699 | 0.013387 | 0.615821 |
| C  | -3.31344 | 0.990273 | -1.81904 |
| C  | 0.020581 | -2.09809 | 2.329424 |
| C  | 1.379171 | 0.342176 | 2.628602 |
| C  | -1.38309 | 0.315931 | 2.629959 |
| Cl | 3.586629 | -3.55867 | 0.902494 |
| Cl | -3.51669 | -3.62945 | 0.894958 |

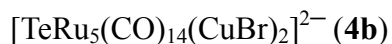

E = -2483.1942675 a.u.

|    | x        | y        | z        |
|----|----------|----------|----------|
| Te | 3.40151  | 5.44743  | 16.32491 |
| Ru | 1.80538  | 3.3021   | 16.27869 |
| Ru | 2.04879  | 5.20962  | 13.99653 |
| Ru | 4.84323  | 4.94596  | 14.04451 |
| Ru | 4.81738  | 3.16254  | 16.2072  |
| Ru | 3.22846  | 2.56542  | 13.85141 |
| Br | 3.29957  | -1.14757 | 16.78044 |
| Br | -1.50976 | 2.36625  | 13.33438 |
| Cu | 3.24636  | 1.05778  | 16.13474 |
| Cu | 0.59796  | 2.98756  | 13.91682 |
| O  | 1.94988  | 3.3624   | 19.31994 |
| O  | 0.18244  | 0.77078  | 16.29416 |
| O  | -0.82304 | 4.84036  | 16.37054 |
| O  | 0.69706  | 7.86883  | 14.42581 |
| O  | 0.26175  | 4.9352   | 11.59588 |
| O  | 3.57639  | 6.7184   | 11.86027 |
| O  | 6.59396  | 7.39865  | 14.44344 |
| O  | 6.31324  | 4.08597  | 11.60959 |
| O  | 7.5404   | 3.92114  | 15.23661 |
| O  | 6.38468  | 0.59453  | 16.39404 |
| O  | 5.84053  | 3.71917  | 18.97134 |
| O  | 1.70499  | -0.03044 | 13.38001 |
| O  | 3.00999  | 3.31448  | 10.92414 |
| O  | 5.77935  | 1.07351  | 13.22138 |
| C  | 1.90734  | 3.29365  | 18.16642 |
| C  | 0.84516  | 1.63917  | 16.2119  |
| C  | 0.1783   | 4.29468  | 16.27262 |
| C  | 1.20972  | 6.86754  | 14.29068 |
| C  | 0.87284  | 4.9198   | 12.53005 |
| C  | 3.48248  | 5.96717  | 12.78465 |
| C  | 5.91757  | 6.45148  | 14.27306 |
| C  | 5.74926  | 4.46005  | 12.52026 |
| C  | 6.39538  | 3.90189  | 15.2699  |
| C  | 5.69306  | 1.50325  | 16.30591 |



|   |         |         |          |
|---|---------|---------|----------|
| C | 5.42651 | 3.49865 | 17.96078 |
| C | 2.11854 | 0.95263 | 13.62873 |
| C | 3.02814 | 3.08471 | 12.00911 |
| C | 4.82907 | 1.62809 | 13.52298 |

[TeRu<sub>5</sub>(CO)<sub>14</sub>(CuBr)<sub>2</sub>]<sup>2-</sup> (**4b**) (the Optimized Geometry)

E = -2483.209825 a.u.

|    | x        | y        | z        |
|----|----------|----------|----------|
| Te | 0.00061  | -1.49904 | 2.00842  |
| Ru | -0.00055 | 1.180766 | 1.380596 |
| Ru | 2.147418 | -0.90725 | 0.358698 |
| Ru | 0.001033 | -2.63743 | -0.60794 |
| Ru | -2.14669 | -0.90888 | 0.3587   |
| Ru | -0.00012 | 0.232134 | -1.44318 |
| Br | -3.67673 | 3.527351 | -0.55903 |
| Br | 3.674288 | 3.529911 | -0.55897 |
| Cu | -2.05592 | 1.751467 | -0.31349 |
| Cu | 2.054522 | 1.753082 | -0.31331 |
| O  | -2.22003 | 1.695421 | 3.468071 |
| O  | -0.00116 | 4.164808 | 0.535825 |
| O  | 2.217838 | 1.696869 | 3.468882 |
| O  | 4.036996 | -1.68797 | 2.650507 |
| O  | 4.674434 | -0.05318 | -1.17421 |
| O  | 2.982896 | -3.48185 | -0.99605 |
| O  | 0.002027 | -5.51909 | 0.50036  |
| O  | 0.001432 | -3.62649 | -3.51155 |
| O  | -2.9802  | -3.48399 | -0.9963  |
| O  | -4.6745  | -0.05662 | -1.17391 |
| O  | -4.03557 | -1.69137 | 2.650485 |
| O  | -0.00116 | 3.038193 | -2.7633  |
| O  | 2.14888  | -0.67338 | -3.45612 |
| O  | -2.14847 | -0.675   | -3.45607 |
| C  | -1.40918 | 1.472492 | 2.638906 |
| C  | -0.00083 | 2.999852 | 0.720161 |
| C  | 1.4074   | 1.473437 | 2.639455 |
| C  | 3.303188 | -1.37425 | 1.770382 |

|   |          |          |          |
|---|----------|----------|----------|
| C | 3.659443 | -0.26187 | -0.6037  |
| C | 2.173099 | -2.67858 | -0.59269 |
| C | 0.001649 | -4.41082 | 0.08327  |
| C | 0.001275 | -3.21705 | -2.40174 |
| C | -2.17102 | -2.68017 | -0.59282 |
| C | -3.65927 | -0.26459 | -0.60354 |
| C | -3.30204 | -1.37697 | 1.770369 |
| C | -0.00078 | 2.035424 | -2.1351  |
| C | 1.378526 | -0.36362 | -2.61037 |
| C | -1.37836 | -0.36461 | -2.61033 |

[TeRu<sub>5</sub>(CO)<sub>14</sub>(CuI)<sub>2</sub>]<sup>2-</sup> (**4c**) (the Optimized Geometry)

E = -2479.646844 a.u.

|    | x        | y        | z        |
|----|----------|----------|----------|
| Te | 0.001019 | -1.79812 | 1.97229  |
| Ru | -0.00035 | 0.904656 | 1.44503  |
| Ru | 2.146338 | -1.14222 | 0.343743 |
| Ru | 0.000937 | -2.83824 | -0.68132 |
| Ru | -2.14534 | -1.14376 | 0.344365 |
| Ru | -0.00017 | 0.068111 | -1.40669 |
| Cu | -2.07713 | 1.54383  | -0.21533 |
| Cu | 2.075894 | 1.545264 | -0.21542 |
| O  | -2.21634 | 1.33198  | 3.556197 |
| O  | -0.00128 | 3.919481 | 0.723312 |
| O  | 2.214913 | 1.333577 | 3.556658 |
| O  | 4.036853 | -1.98839 | 2.61179  |
| O  | 4.672341 | -0.27088 | -1.17883 |
| O  | 2.981315 | -3.67529 | -1.08873 |
| O  | 0.002098 | -5.762   | 0.310503 |
| O  | 0.000805 | -3.70435 | -3.6244  |
| O  | -2.97892 | -3.6774  | -1.08793 |
| O  | -4.67243 | -0.27416 | -1.17739 |
| O  | -4.03468 | -1.99151 | 2.612795 |
| O  | -0.00089 | 2.921383 | -2.61906 |
| O  | 2.144557 | -0.76032 | -3.45678 |
| O  | -2.1451  | -0.76151 | -3.4561  |

|   |          |          |          |
|---|----------|----------|----------|
| C | -1.40781 | 1.14501  | 2.716161 |
| C | -0.0009  | 2.747984 | 0.859896 |
| C | 1.406635 | 1.146081 | 2.716502 |
| C | 3.302965 | -1.64927 | 1.741522 |
| C | 3.659413 | -0.48297 | -0.60601 |
| C | 2.170938 | -2.88462 | -0.66256 |
| C | 0.001662 | -4.63807 | -0.06177 |
| C | 0.000853 | -3.34242 | -2.49832 |
| C | -2.16897 | -2.88618 | -0.66197 |
| C | -3.65916 | -0.48551 | -0.60492 |
| C | -3.30124 | -1.65177 | 1.742384 |
| C | -0.00063 | 1.895403 | -2.0298  |
| C | 1.377118 | -0.48229 | -2.59747 |
| C | -1.37756 | -0.48299 | -2.59703 |
| I | -3.80924 | 3.449364 | -0.39884 |
| I | 3.806881 | 3.451904 | -0.39832 |

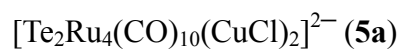

E = -1947.7571854 a.u.

|    | x        | y       | z        |
|----|----------|---------|----------|
| Te | 1.28574  | 1.55262 | 12.69561 |
| Ru | 2.03095  | 2.45881 | 15.18397 |
| Ru | 2.08479  | 4.165   | 12.97415 |
| Cu | 0.79154  | 4.87643 | 10.82354 |
| Cl | 1.0431   | 5.96816 | 8.99501  |
| O  | 3.85494  | 0.07531 | 15.52185 |
| O  | 2.63928  | 3.46412 | 17.95842 |
| O  | 4.57885  | 4.07076 | 14.71561 |
| O  | 2.42759  | 7.16532 | 13.02072 |
| O  | 4.1996   | 3.98551 | 10.8245  |
| C  | 3.16156  | 0.98118 | 15.3996  |
| C  | 2.36127  | 3.05969 | 16.92693 |
| C  | 3.48926  | 3.74361 | 14.42855 |
| C  | 2.28039  | 6.02637 | 13.00149 |
| C  | 3.37913  | 4.03109 | 11.60876 |
| Ru | -0.74217 | 3.35542 | 12.2859  |

|    |          |          |          |
|----|----------|----------|----------|
| Ru | -0.796   | 1.64923  | 14.49571 |
| Te | 0.00304  | 4.26161  | 14.77425 |
| C  | -1.87278 | 4.83305  | 12.07026 |
| C  | -1.07248 | 2.75454  | 10.54293 |
| C  | -2.20048 | 2.07062  | 13.04132 |
| Cu | 0.49724  | 0.9378   | 16.64632 |
| C  | -0.99161 | -0.21214 | 14.46838 |
| C  | -2.09035 | 1.78314  | 15.8611  |
| O  | -2.56616 | 5.73892  | 11.94802 |
| O  | -1.35049 | 2.35011  | 9.51144  |
| O  | -3.29007 | 1.74347  | 12.75426 |
| Cl | 0.24568  | -0.15393 | 18.47486 |
| O  | -1.1388  | -1.35109 | 14.44915 |
| O  | -2.91081 | 1.82872  | 16.64536 |

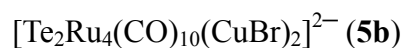

E = -1944.1996339 a.u.

|    | x       | y        | z        |
|----|---------|----------|----------|
| Te | 3.8464  | 1.33255  | 1.05239  |
| Ru | 5.88487 | -0.45722 | 1.45304  |
| Ru | 5.93846 | 1.27806  | -0.73512 |
| Br | 4.92474 | 3.23619  | -4.75823 |
| Cu | 4.6455  | 2.01487  | -2.86903 |
| O  | 6.46692 | 0.46533  | 4.26172  |
| O  | 7.71271 | -2.85213 | 1.77017  |
| O  | 8.41698 | 1.18078  | 1.01688  |
| O  | 8.06514 | 1.13909  | -2.86612 |
| O  | 6.26237 | 4.27346  | -0.65896 |
| C  | 6.20196 | 0.06073  | 3.19768  |
| C  | 7.03666 | -1.93137 | 1.66196  |
| C  | 7.33604 | 0.84343  | 0.75052  |
| C  | 7.21735 | 1.18237  | -2.09618 |
| C  | 6.11128 | 3.1374   | -0.71722 |
| Ru | 3.11613 | 0.45722  | -1.45304 |
| Ru | 3.06254 | -1.27806 | 0.73512  |
| Te | 5.1546  | -1.33255 | -1.05239 |

|    |         |          |          |
|----|---------|----------|----------|
| C  | 2.79904 | -0.06073 | -3.19768 |
| C  | 1.96434 | 1.93137  | -1.66196 |
| C  | 1.66496 | -0.84343 | -0.75052 |
| Cu | 4.3555  | -2.01487 | 2.86903  |
| C  | 1.78365 | -1.18237 | 2.09618  |
| C  | 2.88972 | -3.1374  | 0.71722  |
| O  | 2.53408 | -0.46533 | -4.26172 |
| O  | 1.28829 | 2.85213  | -1.77017 |
| O  | 0.58402 | -1.18078 | -1.01688 |
| Br | 4.07627 | -3.23619 | 4.7582   |
| O  | 0.93586 | -1.13909 | 2.86612  |
| O  | 2.73863 | -4.27346 | 0.65896  |

$[\text{Te}_2\text{Ru}_4(\text{CO})_{10}(\text{CuI})_2]^{2-}$  (**5c**)

E = -1940.6309079 a.u.

|    | x        | y        | z        |
|----|----------|----------|----------|
| I  | -2.50966 | 8.07702  | 4.45089  |
| Te | -1.08221 | 13.13468 | 1.22532  |
| Ru | -3.30347 | 11.53591 | 1.27181  |
| Ru | -0.52821 | 10.49369 | 0.73829  |
| Cu | -2.12353 | 9.61531  | 2.59564  |
| O  | 2.07787  | 10.47471 | -0.80556 |
| O  | -3.9434  | 11.98415 | 4.18401  |
| O  | -5.58348 | 9.58398  | 1.23479  |
| O  | -0.44658 | 7.48207  | 0.39602  |
| O  | 1.31465  | 10.34817 | 3.12879  |
| C  | 1.00703  | 10.87825 | -0.58911 |
| C  | -3.66539 | 11.79587 | 3.09066  |
| C  | -4.6977  | 10.29572 | 1.24217  |
| C  | -0.49499 | 8.62069  | 0.53991  |
| C  | 0.60222  | 10.38754 | 2.23836  |
| Ru | -0.18953 | 12.41653 | -1.27181 |
| Ru | -2.96479 | 13.45876 | -0.73829 |
| Te | -2.41079 | 10.81777 | -1.22532 |
| Cu | -1.36947 | 14.33714 | -2.59564 |
| C  | 0.17239  | 12.15657 | -3.09066 |

|   |          |          |          |
|---|----------|----------|----------|
| C | 1.2047   | 13.65673 | -1.24217 |
| C | -4.50003 | 13.07419 | 0.58911  |
| C | -2.99801 | 15.33176 | -0.53991 |
| C | -4.09522 | 13.56491 | -2.23836 |
| I | -0.98334 | 15.87543 | -4.45089 |
| O | 0.4504   | 11.9683  | -4.18401 |
| O | 2.09048  | 14.36847 | -1.23479 |
| O | -5.57087 | 13.47774 | 0.80556  |
| O | -3.04643 | 16.47038 | -0.39602 |
| O | -4.80765 | 13.60428 | -3.12879 |
